# Supplementary material for: Calcium ions trigger the exposure of phosphatidylserine on the surface of necrotic cells
Source: PLoS Genet. 2021 Feb 11;17(2):e1009066. doi: 10.1371/journal.pgen.1009066 (PMC7904182; doi:10.1371/journal.pgen.1009066)
Supplement: S1 Data — (XLSX) [file pgen.1009066.s005.xlsx]

## Sheet: Fig 1
No data to be disclosed

## Sheet: Fig 2
Fig 2B and C					Fig 2E	Ca2+ intensity and PS intensity in each timpoint is substracted by 1
	mec-4(1611) embryo 1					Ca2+_intensity_log10_Embryo 1	PS intensity_log10_Embryo 1	Ca2+_intensity_log10_Embryo 2	PS intensity_log10_Embryo 2	Ca2+_intensity_log10_Embryo 3	PS intensity_log10_Embryo 3	Ca2+_intensity_log10_Embryo 4	PS intensity_log10_Embryo 4
	Time post-1st embryonic cell devision (min)	Ca2+ intensity	PS intensity			0.731995	1.11161	0.450515	1.29484	0.828744	1.52195	1.47262	2.2681
	560	1.275	2.27477			0.893706	1.30253	0.994289	1.75275	1.18829	1.8312	1.53224	2.34813
	562.5					1.087	1.59259	1.23289	1.96982	1.47855	2.10505	1.67057	2.58861
	565					1.30225	1.88077	1.29349	2.03818	1.50577	2.13951	1.78807	2.82959
	567.5					1.33367	1.92072	1.40304	2.16279	1.53894	2.1717	1.79692	2.85281
	570					1.35137	1.94112	1.4718	2.18584	1.7711	2.40343	1.87773	2.99507
	572.5					1.51441	2.13723	1.50323	2.1971	1.85292	2.5418	1.92459	3.06855
	575					1.53319	2.1586	1.52291	2.2196	1.92763	2.6685	1.93221	3.0823
	577.5					1.60909	2.21938	1.62826	2.33665	1.95421	2.7328	1.93971	3.096
	580					1.69214	2.3301	1.72426	2.43394	1.97691	2.81469	1.94722	3.11082
	582.5					1.76212	2.4503	1.77367	2.48785	1.993	2.86914	1.97393	3.16464
	585	1.26191	2.38621			1.80542	2.51191	1.89412	2.6483	2.00831	2.92022	1.98546	3.18982
	587.5					1.86143	2.63798	1.94688	2.73189	2.02201	2.96612	2.00704	3.23815
	590					1.89102	2.72963	2.00965	2.85311	2.04212	3.02868	2.01261	3.2492
	592.5					1.96264	2.92673
	595					1.96842	2.94304
	597.5					1.98554	2.98841
	600					1.99663	3.01439
	602.5
	605
	607.5
	610	1.43297	2.3765
	612.5
	615
	617.5
	620
	622.5
	625
	627.5
	630
	632.5
	635
	637.5
	640
	642.5
	645	1.40541	3.0274
	647.5
	650	1.37324	3.17992
	652.5
	655	1.6443	3.06407
	657.5
	660
	662.5
	665
	667.5
	670
	672.5
	675
	677.5
	680
	685
	690
	695
	700	1.44214	3.58885
	705
	710
	715
	720
	725
	730
	735	1.25714	3.83951
	740
	745
	750
	755
	760
	765
	770
	775	1.41176	4.05769
	780
	785
	790	1.30081	7.85908
	795
	800
	805	1.34286	9.09605
	810
	815	1.37302	10.3409
	820
	825	1.33333	10.125
	830
	835	1.31967	10.4318
	840
	845
	850	1.34507	10.6744
	855
	860	1.34587	7.41509
	865
	870
	875
	880	1.30509	9.47368
	885	1.33077	13.6316
	890
	895
	900

## Sheet: Fig 3
Fig3 A								Fig3 C
		DMSO	Dantrolene							DMSO	Dantrolene
	Normalized PS intensity	0 μM	1 μM	2 μM	3 μM	4 μM			# Necrotic PLM neurons / L1 larva	0 μM	1 μM	2 μM	3 μM	4 μM
	AVG	1	0.624	0.605074	0.428645	0.473273			AVG	1.675	1.525	1.55	1.25	1.1333
	SEM	0.0644797	0.0252774	0.0351653	0.0307238	0.0316917			SEM	0.8375	0.7625	0.775	0.625	0.0666667
	N	41	46	47	38	33			N	40	40	40	35	30

## Sheet: Fig 4
Fig 4A and B	time interval 2.5min from 560-800min for this data
	Time post-1st embryonic cell devision (min)	Necrotic PLML (0 µM Dantrolene)	Necrotic PLMR (0 µM Dantrolene)	Non-necrotic PLML (4 µM Dantrolene)	Non-necrotic PLMR (4 µM Dantrolene)
	560
	562.5
	565
	567.5
	570	1.78533	1.31937	1.34945	1.40643
	572.5
	575	1.59406
	577.5
	580
	582.5
	585
	587.5	1.65489
	590	1.62807
	592.5
	595
	597.5
	600	1.63077
	602.5	2.033	1.30011
	605
	607.5
	610
	612.5
	615	1.626	1.24528
	617.5
	620
	622.5
	625
	627.5	1.94399
	630
	632.5
	635
	637.5
	640
	642.5
	645			1.27857	1.17797
	647.5
	650	1.73321	1.20791
	652.5	1.86347
	655	1.62703	1.29204
	657.5
	660
	662.5
	665	1.86047
	667.5		1.29151
	670			1.3964	1.17249
	672.5	1.52296	1.19463
	675			1.37339	1.22308
	677.5
	680
	682.5
	685
	687.5
	690
	692.5
	695
	697.5
	700		1.48182
	702.5		1.64274
	705
	707.5	1.18018	1.55068
	710			1.27778	1.26035
	712.5
	715
	717.5
	720	1.23577	1.71678
	722.5
	725
	727.5
	730	1.25664	1.44495
	732.5
	735	1.23077	1.63044
	737.5	1.35088
	740			1.30081	1.33126
	742.5
	745
	747.5
	750
	752.5
	755
	757.5
	760			1.2	1.20988
	762.5
	765
	767.5
	770
	772.5
	775	1.21091	1.49631
	777.5
	780		1.25225
	782.5
	785		1.14286	1.23706	1.18681
	787.5
	790
	792.5
	795	1.16541	1.23387
	797.5
	800

## Sheet: Fig 5
Fig 5A						Fig 5C						Fig 5D				Fig 5F
	# Necrotic cells in head/L1 larva	deg-1	deg-1; crt-1(bz50)	deg-1; crt-1(bz29)			Normalized PS intensity	deg-1	deg-1; crt-1(bz50)	deg-1; crt-1(bz29)		# Necrotic cells / L1 larva	unc-8	unc-8; crt-1(bz29)		Normalized relative PS intensity	unc-8	unc-8; crt-1(bz29)
	AVG	1.66	0.661667	0.645846			AVG	1	0.105765	0.0816779		AVG	6.46667	3.28571		AVG	1	0.2932
	SEM	0.280357	0.0988638	0.08026			SEM	0.0596106	0.020628	0.00641989		SEM	0.785988	0.3841		SEM	0.06487	0.0178
	N	50	77	129			N	54	51	80		N	15	14		N	20	20

## Sheet: Fig 6
Fig 6A						Fig 6C
	# Necrotic cells/ L1 larva	TG (0µg/ml)	TG (3µg/ml)	TG (6µg/ml)			Normalized PS intensity	anoh-1(+) TG (3.0 µg/ml)	anoh-1(tm4762) TG (3.0 µg/ml)	anoh-1(+) TG (6.0 µg/ml)	anoh-1(tm4762) TG (6.0 µg/ml)
	AVG	0.0119048	0.144444	0.204444			AVG	1	0.485979	1.87461	0.612804
	SEM	0.0119048	0.0293972	0.0731648			SEM	0.232713	0.0680549	0.269796	0.0545073
	N	83	90	74			N	10	21	14	22

## Sheet: FIg 7
Fig 7A					Fig 7C					Fig 7D
# Necrotic PLM neurons/L1 larva	mec-4(1611)	unc-51(e396); mec-4(1611)			% PS+ live PLM neurons	unc-51(+); mec-4(+)	unc-51(e396); mec-4(e1611)				Relative PS intensity	mec-4 (e1611);unc-51(+)	mec-4(e1611);unc-51(e369)
AVG	1.7	1.2741			AVG	0	27.515				AVG	2.66454	2.18851
SEM	0.02582	0.0472			SEM	0	1.5755				SEM	0.292591	0.105176
N	60	60			N	45	58				N	12	12

## Sheet: Fig 8
Fig 8B					Fig 8C						Fig 8E						Fig 8F
	Normalized PS intesity	deg-3(u662);crt-1(+)	deg-3(u662);crt-1(bz29)			# Necrotic cells in head/ L1 larva	deg-3(u662)	deg-3(u662);crt-1(bz29)				Normalized PS intensity	trp-4(ot337)	trp-4(ot337);crt-1(bz29)				# of necrotic cells/ L1 larva	trp-4(ot337)	trp-4(ot337);crt-1(bz29)
	AVG	1	1.13331			AVG	0.962963	1.02564				AVG	1	0.992393				AVG	2	2
	SEM	0.0559066	0.0755754			SEM	0.141033	0.127777				SEM	0.038818	0.028544				SEM	0	0
	N	25	28			N	27	27				N	26	26				N	13	12

## Sheet: Fig 9
Fig 9B
Normalized relative PS intensity	trp-4(ot337)	trp-4(ot337); anoh-1(tm4762)
AVG	1	0.4883
SEM	0.084	0.05706
N	20	20

## Sheet: Fig 10
Fig 10A						Fig 10C
# Apoptotic cells in head/ L1 larva	ced-1(bz29)	ced-1(e1735); crt-1(bz29)					Normalized PS intensity	ced-1(e1735);crt-1(+)	ced-1;crt-1(bz29)
AVG	21.5	21.375					AVG	1	0.887833
SEM	0.694	0.694					SEM	0.0463447	0.111016
n	20	16					N	41	29

[truncated: 5 more sheets: Fig 11, Fig S1, Fig S2, Fig S3, Fig S4]
